# Supplementary material for: Unintended Consequences of Antibiotic Use in Beekeeping: Drone Health as a Hidden Vulnerability
Source: Research Square preprint supplement (doi:10.21203/rs.3.rs-6933730/v1), 2025-07-02
Supplement: Supplementary file 1 [file 3956720cb8b6d97bc1845e40.xlsx]

## Sheet: Sheet1
Sample	TreatTis	d__Bacteria;p__Proteobacteria;c__Alphaproteobacteria;o__Acetobacterales;f__Acetobacteraceae;g__Commensalibacter;__	d__Bacteria;p__Proteobacteria;c__Gammaproteobacteria;o__Burkholderiales;f__Neisseriaceae;g__Snodgrassella;__	d__Bacteria;p__Firmicutes;c__Bacilli;o__Lactobacillales;f__Lactobacillaceae;g__Lactobacillus;s__Lactobacillus_mellis	d__Bacteria;p__Actinobacteriota;c__Actinobacteria;o__Bifidobacteriales;f__Bifidobacteriaceae;g__Bifidobacterium;__	d__Bacteria;p__Proteobacteria;c__Gammaproteobacteria;__;__;__;__	d__Bacteria;p__Desulfobacterota;c__Desulfovibrionia;o__Desulfovibrionales;f__Desulfovibrionaceae;g__Desulfovibrio;s__uncultured_proteobacterium	d__Bacteria;p__Firmicutes;c__Bacilli;o__Lactobacillales;f__Streptococcaceae;g__Streptococcus;__	d__Bacteria;p__Proteobacteria;c__Gammaproteobacteria;o__Pseudomonadales;f__Pseudomonadaceae;g__Pseudomonas;__	d__Bacteria;p__Proteobacteria;c__Gammaproteobacteria;o__Enterobacterales;f__Enterobacteriaceae;__;__	d__Bacteria;p__Proteobacteria;c__Alphaproteobacteria;o__Rhizobiales;f__Xanthobacteraceae;g__Bradyrhizobium;__	d__Bacteria;p__Firmicutes;__;__;__;__;__	d__Bacteria;p__Firmicutes;c__Bacilli;o__Lactobacillales;f__Lactobacillaceae;g__Lactobacillus;__	d__Bacteria;p__Proteobacteria;c__Alphaproteobacteria;o__Sphingomonadales;f__Sphingomonadaceae;g__Sphingomonas;__	d__Bacteria;p__Firmicutes;c__Bacilli;o__Lactobacillales;f__Lactobacillaceae;g__Lactobacillus;s__Lactobacillus_apinorum	d__Bacteria;p__Firmicutes;c__Clostridia;o__Lachnospirales;f__Lachnospiraceae;__;__	d__Bacteria;p__Firmicutes;c__Bacilli;o__Lactobacillales;f__Lactobacillaceae;g__Lactobacillus;s__Lactobacillus_melliventris	d__Bacteria;p__Proteobacteria;c__Alphaproteobacteria;o__Rhizobiales;f__Rhizobiaceae;__;__	d__Bacteria;p__Proteobacteria;c__Gammaproteobacteria;o__Orbales;f__Orbaceae;__;__	d__Bacteria;p__Fusobacteriota;c__Fusobacteriia;o__Fusobacteriales;f__Fusobacteriaceae;g__Fusobacterium;__	d__Bacteria;p__Proteobacteria;c__Gammaproteobacteria;o__Orbales;f__Orbaceae;g__Gilliamella;__	d__Bacteria;p__Proteobacteria;c__Alphaproteobacteria;o__Acetobacterales;f__Acetobacteraceae;g__Commensalibacter;s__uncultured_Gluconacetobacter	d__Bacteria;p__Firmicutes;c__Bacilli;__;__;__;__	d__Bacteria;p__Proteobacteria;c__Alphaproteobacteria;o__Rhizobiales;f__Rhizobiaceae;g__Bartonella;__	d__Bacteria;p__Proteobacteria;c__Alphaproteobacteria;o__Rhizobiales;f__Rhizobiaceae;g__Bartonella;s__uncultured_Bartonella	d__Bacteria;p__Firmicutes;c__Bacilli;o__Lactobacillales;f__Lactobacillaceae;g__Lactobacillus;s__Lactobacillus_mellifer	d__Bacteria;p__Actinobacteriota;c__Actinobacteria;o__Kineosporiales;f__Kineosporiaceae;g__Kineococcus;s__Kineococcus_xinjiangensis	d__Bacteria;p__Bacteroidota;c__Bacteroidia;o__Bacteroidales;f__Prolixibacteraceae;g__uncultured;s__Bacteroidales_bacterium	d__Bacteria;p__Firmicutes;c__Bacilli;o__Staphylococcales;f__Staphylococcaceae;g__Staphylococcus;__	d__Bacteria;p__Bdellovibrionota;c__Bdellovibrionia;o__Bdellovibrionales;f__Bdellovibrionaceae;g__Bdellovibrio;s__uncultured_bacterium	d__Bacteria;p__Proteobacteria;c__Alphaproteobacteria;o__Rhodobacterales;f__Rhodobacteraceae;__;__	d__Bacteria;p__Proteobacteria;c__Alphaproteobacteria;o__Reyranellales;f__Reyranellaceae;g__Reyranella;__	d__Bacteria;p__Bacteroidota;c__Bacteroidia;o__Bacteroidales;f__Rikenellaceae;g__Alistipes;__	d__Bacteria;p__Proteobacteria;c__Gammaproteobacteria;o__Enterobacterales;f__Morganellaceae;g__Providencia;__	d__Bacteria;p__Proteobacteria;c__Gammaproteobacteria;o__Xanthomonadales;f__Xanthomonadaceae;g__Stenotrophomonas;s__Stenotrophomonas_rhizophila	d__Bacteria;p__Actinobacteriota;c__Actinobacteria;o__Corynebacteriales;f__Mycobacteriaceae;g__Mycobacterium;__	d__Bacteria;p__Proteobacteria;c__Alphaproteobacteria;o__Acetobacterales;f__Acetobacteraceae;__;__	d__Bacteria;p__Actinobacteriota;c__Actinobacteria;o__Pseudonocardiales;f__Pseudonocardiaceae;g__Lechevalieria;__	d__Bacteria;p__Firmicutes;c__Bacilli;o__Lactobacillales;__;__;__	d__Bacteria;p__Proteobacteria;c__Gammaproteobacteria;o__Alteromonadales;f__Alteromonadaceae;g__Alishewanella;__	d__Bacteria;p__Proteobacteria;c__Gammaproteobacteria;o__Burkholderiales;f__Comamonadaceae;g__Delftia;__	d__Bacteria;p__Proteobacteria;c__Gammaproteobacteria;o__Enterobacterales;__;__;__	d__Bacteria;p__Actinobacteriota;c__Actinobacteria;o__Propionibacteriales;f__Propionibacteriaceae;g__Cutibacterium;__	d__Bacteria;p__Proteobacteria;c__Gammaproteobacteria;o__Burkholderiales;f__Neisseriaceae;__;__	d__Bacteria;p__Firmicutes;c__Bacilli;o__Lactobacillales;f__Lactobacillaceae;g__Lactobacillus;s__Lactobacillus_apis	d__Bacteria;p__Bacteroidota;c__Bacteroidia;o__Chitinophagales;f__Chitinophagaceae;__;__	d__Bacteria;p__Firmicutes;c__Bacilli;o__Lactobacillales;f__Lactobacillaceae;g__Lactobacillus;s__Lactobacillus_helsingborgensis	d__Bacteria;p__Actinobacteriota;c__Actinobacteria;o__Corynebacteriales;f__Corynebacteriaceae;g__Corynebacterium;__	d__Bacteria;p__Proteobacteria;c__Gammaproteobacteria;o__Burkholderiales;f__Oxalobacteraceae;g__Massilia;__
2C22G	ControlGut	0	0.352	0	0.00366667	0	0	0	0	0	0	0	0.254667	0	0	0	0.0533333	0	0	0	0	0	0	0	0	0	0	0	0	0	0	0	0	0	0	0	0	0	0	0	0	0	0	0	0.0666667	0	0.118333	0	0
2C23G	ControlGut	0.004	0.411333	0	0	0	0	0	0	0	0	0	0.098	0	0	0	0.0153333	0	0	0	0	0	0	0	0	0	0	0	0	0	0	0	0	0	0	0	0	0	0	0	0	0	0	0	0.230667	0	0.108333	0	0
2C24G	ControlGut	0	0.446333	0.003	0.006	0	0	0	0	0	0	0	0.102667	0	0	0	0	0	0	0	0	0	0	0	0	0	0	0	0	0	0	0	0	0	0	0	0	0	0	0	0	0	0	0	0.124	0	0.267333	0	0
2C25G	ControlGut	0.00866667	0.328	0	0.0313333	0	0	0	0	0	0	0	0.184333	0	0	0	0.0336667	0	0	0	0	0	0	0	0	0	0	0	0	0	0	0	0	0	0	0	0	0	0	0	0	0	0	0	0.102333	0	0.238333	0	0
2C26G	ControlGut	0.0813333	0.222	0.00266667	0.0136667	0	0	0	0	0	0	0	0.294667	0	0	0	0.058	0	0.0376667	0	0	0	0	0	0	0	0	0	0	0	0	0	0	0	0	0	0	0	0	0	0	0	0	0	0.154	0	0.0983333	0	0
2C27G	ControlGut	0.0386667	0.388	0	0.06	0	0	0	0	0	0	0	0.172	0	0	0	0.0236667	0	0	0	0	0	0	0	0	0.00366667	0	0	0	0	0	0	0	0	0	0	0	0	0	0	0	0	0	0	0.221333	0	0.0926667	0	0
2C31G	ControlGut	0.0686667	0.36	0	0.0136667	0	0	0	0	0	0	0	0	0	0	0	0.0343333	0	0	0	0	0	0	0	0	0	0	0	0	0	0	0	0	0	0	0	0	0	0	0	0	0	0	0	0.109333	0	0.414	0	0
2C32G	ControlGut	0.0343333	0.397667	0	0.0153333	0	0	0	0	0	0	0	0.334667	0	0	0	0	0	0	0	0	0	0	0	0	0	0	0	0	0	0	0	0	0	0	0	0.00566667	0	0	0	0	0	0	0	0.108333	0	0.104	0	0
2C33G	ControlGut	0.0386667	0.006	0	0	0	0	0	0	0	0	0	0.0333333	0	0	0	0.213	0	0	0	0	0	0	0	0	0	0	0	0	0	0	0	0	0	0	0	0	0	0	0	0	0	0	0	0.360667	0	0.348333	0	0
2C34G	ControlGut	0	0.474667	0	0.004	0	0	0	0	0	0	0	0.0263333	0	0	0	0.0193333	0	0	0	0	0	0	0	0	0	0	0	0	0	0	0	0	0	0	0	0	0	0	0	0	0	0	0	0.131	0	0.344333	0	0
2C35G	ControlGut	0.0203333	0	0.0103333	0.0326667	0	0	0	0	0	0	0	0.211667	0	0	0	0.0756667	0	0	0	0	0	0	0	0	0	0	0	0	0	0	0	0	0	0	0	0.069	0	0	0	0	0	0	0	0.205333	0	0.375	0	0
2C36G	ControlGut	0.0753333	0.430667	0.004	0.057	0	0	0	0	0	0	0	0.018	0	0	0	0	0	0	0	0	0	0	0.00633333	0	0.00566667	0	0	0	0	0	0	0	0.002	0	0	0	0	0	0	0	0	0	0	0.138	0	0.108	0	0
2C41G	ControlGut	0.159667	0	0.00666667	0.0733333	0	0	0	0	0	0	0	0.233	0	0	0	0.0546667	0	0	0	0	0	0	0	0	0	0	0	0	0	0	0	0	0	0	0	0	0	0	0	0	0	0	0	0.291333	0	0.153	0	0
2C42G	ControlGut	0.101333	0.321333	0	0.0166667	0	0	0	0	0	0	0	0.110667	0	0	0	0.142333	0	0	0	0	0	0	0	0	0.00533333	0	0	0	0	0	0	0	0	0	0	0	0	0	0	0	0	0	0	0.191	0	0.111333	0	0
3C11G	ControlGut	0	0	0	0.0133333	0	0	0	0	0	0	0	0.179667	0	0	0	0.0776667	0	0	0	0	0	0	0	0	0	0	0	0	0	0	0	0	0.359	0	0	0	0	0	0	0	0	0	0	0.248667	0	0.121667	0	0
3C12G	ControlGut	0.01	0	0.00466667	0.00566667	0	0	0	0	0	0	0	0.0536667	0	0	0	0.066	0	0	0	0	0	0	0	0	0	0	0	0	0	0	0	0	0.441333	0	0	0.00466667	0	0	0	0	0	0	0	0.152667	0	0.257333	0	0
3C13G	ControlGut	0.00966667	0	0.002	0.0286667	0	0	0	0	0	0	0	0.281333	0	0	0	0.0563333	0	0	0	0	0	0	0	0	0	0	0	0	0	0	0	0	0.346667	0	0	0.006	0	0	0	0	0	0	0	0.0956667	0	0.151333	0	0
3C14G	ControlGut	0.017	0	0	0.00733333	0	0	0	0	0	0	0	0.157667	0	0	0	0.0576667	0	0	0	0	0	0	0	0	0	0	0	0	0	0	0	0	0.00133333	0	0	0	0	0	0	0	0	0	0	0.228667	0	0.189333	0	0
3C15G	ControlGut	0.034	0	0	0.011	0	0	0	0	0	0	0	0.393	0	0.034	0	0.0193333	0	0	0	0	0	0	0	0	0	0	0	0	0	0	0	0	0	0	0	0	0	0	0	0	0	0	0	0.191	0	0.06	0	0
3C21G	ControlGut	0	0.0856667	0.007	0.069	0	0	0	0	0	0	0	0.0356667	0	0	0	0.093	0	0	0	0	0	0	0.00733333	0	0	0	0	0	0	0	0	0	0	0	0	0	0	0	0	0	0	0	0	0.148333	0	0.336333	0	0
3C22G	ControlGut	0.128	0	0	0.0853333	0	0	0	0	0	0	0	0.211667	0	0	0	0.078	0	0	0	0	0	0	0	0	0.0123333	0	0	0	0	0	0	0	0.0853333	0	0	0	0	0	0	0	0	0	0	0.103667	0	0.247333	0	0
3C23G	ControlGut	0	0	0	0.0183333	0	0	0	0	0	0	0	0.449333	0	0.002	0	0	0	0	0	0	0	0	0	0	0	0	0	0	0	0	0	0	0.376	0	0	0	0	0	0	0	0	0	0	0.0486667	0	0.105667	0	0
3C24G	ControlGut	0	0	0	0	0	0	0	0	0	0	0	0.140667	0	0	0	0	0	0	0	0	0	0	0	0	0	0	0	0	0	0	0	0	0.065	0	0	0	0	0	0	0	0	0	0	0.325333	0	0.283	0	0
3C25G	ControlGut	0.227333	0	0.000333333	0.0753333	0	0	0	0	0	0	0	0.311333	0	0.009	0	0.011	0	0	0	0	0	0	0	0	0.00266667	0	0	0	0	0	0	0	0	0	0	0	0	0	0	0	0	0	0	0.2	0	0.156	0	0
3C26G	ControlGut	0.0173333	0	0	0.104333	0	0	0	0	0	0	0	0.0863333	0	0	0	0.240333	0	0	0	0	0	0	0	0	0	0	0	0	0	0	0	0	0.00133333	0	0	0.075	0	0	0	0	0	0	0	0.191667	0	0.283667	0	0
3C31G	ControlGut	0.0326667	0.0693333	0	0.0143333	0	0	0	0	0	0	0	0.120333	0	0.011	0	0.0886667	0	0	0	0	0	0	0	0	0	0	0	0	0	0	0	0	0	0	0	0	0	0	0	0	0	0	0	0.231	0	0.183	0	0
3C41G	ControlGut	0	0	0.00866667	0	0	0	0	0	0	0	0	0.0633333	0	0	0	0.0143333	0	0	0	0	0	0	0	0	0	0	0	0	0	0	0	0	0	0	0	0	0	0	0	0	0	0	0	0.457333	0	0.452	0	0
3C42G	ControlGut	0.225333	0	0	0	0	0	0	0	0	0	0	0.213667	0	0	0	0	0	0	0	0	0	0	0	0	0	0	0	0	0	0	0	0	0	0	0	0	0	0	0	0	0	0	0	0.244333	0	0.316667	0	0
3C43G	ControlGut	0.016	0	0	0.012	0	0	0	0	0	0	0	0.142	0	0.0153333	0	0	0	0	0	0	0	0	0	0	0	0	0	0	0	0	0	0	0	0	0	0	0	0	0	0	0	0	0	0.165667	0	0.318667	0	0
3C44G	ControlGut	0.0316667	0	0.022	0.00766667	0	0	0	0	0	0	0	0.263667	0	0	0	0.210667	0	0	0	0	0	0	0	0	0	0	0	0	0	0	0	0	0	0	0	0	0	0	0	0	0	0	0	0.209667	0	0	0	0
3C45G	ControlGut	0	0	0	0.0126667	0	0	0	0	0	0	0	0.435333	0	0	0	0.0276667	0	0	0	0	0	0	0	0	0	0	0	0	0	0	0	0	0	0	0	0	0	0	0	0	0	0	0	0.191	0	0.122667	0	0
3C46G	ControlGut	0	0.322	0.00433333	0.0333333	0	0	0	0	0	0	0	0.184333	0	0	0	0.113667	0	0	0	0	0	0	0	0	0	0	0	0	0	0	0	0	0	0	0	0	0	0	0	0	0	0	0	0.172667	0	0.108	0	0
1C11M	ControlMG	0.160667	0.0573333	0.00866667	0.057	0	0	0	0.0153333	0	0	0	0.195	0	0	0	0.0753333	0	0	0	0.034	0	0	0	0	0	0	0	0	0	0	0	0	0	0	0	0	0	0.034	0	0	0	0	0	0.0836667	0	0.259333	0.001	0
1C12M	ControlMG	0.013	0.0426667	0.021	0.0953333	0.000666667	0	0	0.00433333	0	0	0.00466667	0.419	0.000666667	0	0	0.0466667	0	0	0	0.0113333	0	0.00333333	0	0.00166667	0	0	0	0.002	0	0	0	0.000666667	0	0	0	0	0	0.017	0	0	0	0	0	0.112333	0	0.188	0	0
1C13M	ControlMG	0.008	0.0216667	0.0136667	0.145	0	0	0	0.00266667	0	0	0	0.256667	0	0	0	0.108333	0	0	0	0.00733333	0	0	0	0	0	0	0	0	0	0	0	0	0	0	0	0	0	0	0	0	0	0	0	0.186667	0	0.25	0	0
1C15M	ControlMG	0	0.182667	0.0116667	0.097	0	0	0	0.153333	0.00666667	0	0	0.095	0.007	0	0.00166667	0.0326667	0	0	0.000333333	0.0903333	0.00633333	0.0146667	0.0283333	0	0	0	0.001	0.00466667	0	0.00533333	0	0	0.00233333	0	0	0	0	0	0	0.0233333	0	0	0	0.0903333	0.00266667	0.0413333	0.00466667	0
1C21M	ControlMG	0	0.127667	0.022	0.0783333	0	0	0	0.302	0	0	0	0.151333	0.00666667	0	0	0	0	0.018	0	0.0676667	0.005	0.023	0.0173333	0	0	0	0.000666667	0	0.000666667	0	0	0	0.00566667	0	0	0	0	0	0	0.0203333	0	0	0	0.0736667	0	0	0.00333333	0
1C22M	ControlMG	0.008	0.208333	0.02	0.057	0	0	0	0.009	0.00566667	0	0	0.130667	0.00766667	0.0133333	0.00533333	0.0286667	0	0.00166667	0.001	0.109	0	0.016	0.022	0	0	0	0.002	0.00633333	0	0.00366667	0	0.000666667	0	0	0	0.00366667	0	0	0.001	0.0263333	0	0	0	0.0966667	0.002	0.0736667	0.004	0
1C23M	ControlMG	0.008	0.187	0	0.117333	0.0216667	0	0	0.116	0	0	0	0.144333	0.01	0.0236667	0	0.035	0	0	0.00166667	0.117	0	0	0.0203333	0	0	0	0	0.00633333	0	0	0	0.00166667	0	0	0	0	0	0	0	0.0426667	0	0	0	0	0	0.061	0.00233333	0
1C25M	ControlMG	0	0.196333	0.016	0.0906667	0	0	0	0.025	0.008	0	0	0.124	0.00966667	0	0	0.029	0	0	0.00266667	0.114667	0.00533333	0.025	0.0196667	0	0.00166667	0	0.00166667	0.00766667	0.001	0	0	0.002	0.00466667	0.001	0	0	0	0	0	0.0313333	0	0	0	0.084	0.005	0.0833333	0.00433333	0
2C11M	ControlMG	0.0336667	0.314	0.00333333	0.0163333	0	0	0	0	0	0	0	0.313	0	0	0	0	0	0	0	0	0	0	0	0	0	0	0	0	0	0	0	0	0	0	0	0	0	0	0	0	0	0	0.0506667	0.11	0	0.159	0	0
2C23M	ControlMG	0.0166667	0.444667	0	0	0	0	0	0	0	0	0	0.18	0	0	0	0	0	0	0	0	0	0	0	0	0	0	0	0	0	0	0	0	0	0	0	0	0	0	0	0	0	0	0	0.217	0	0.141667	0	0
2C27M	ControlMG	0	0.156333	0	0.0946667	0	0	0	0.230667	0	0	0	0.140667	0.044	0	0	0	0	0.0123333	0	0.0546667	0	0.0213333	0	0	0	0	0	0	0	0	0	0	0	0	0	0	0	0	0	0.0313333	0	0	0	0.0633333	0	0	0	0
2C32M	ControlMG	0.008	0.220333	0.012	0.118333	0	0	0	0	0	0	0	0.158667	0.00633333	0	0	0	0	0	0.00133333	0.0763333	0	0	0.0183333	0	0	0	0	0	0	0	0	0	0	0	0	0	0	0.027	0	0.0233333	0	0	0	0.096	0	0.124667	0	0
2C33M	ControlMG	0.00733333	0.221	0.0126667	0.111	0.002	0	0	0.00866667	0	0	0.043	0.128	0.00566667	0.00866667	0.00233333	0.0476667	0	0	0.00166667	0.0686667	0	0	0.0193333	0	0	0	0.00133333	0	0.000333333	0	0	0	0	0	0	0	0	0	0	0	0	0	0	0.071	0	0.132	0	0
2C34M	ControlMG	0	0.290333	0.012	0.0576667	0	0	0	0.00166667	0	0	0.014	0.0713333	0	0	0	0.0666667	0	0	0	0.036	0	0	0.007	0	0	0	0	0	0	0	0	0	0	0	0	0	0	0	0	0.0246667	0	0	0.0346667	0.0606667	0	0.3	0	0
2C35M	ControlMG	0.014	0.0273333	0.0136667	0.0963333	0	0	0	0	0	0	0	0.186	0	0	0	0.0923333	0	0	0	0.00533333	0	0.0126667	0	0	0	0	0	0	0	0	0	0	0	0	0	0.0433333	0	0	0	0	0	0	0	0.130667	0	0.377	0	0
2C36M	ControlMG	0	0.434333	0	0.022	0	0	0	0	0	0	0	0	0	0	0	0	0	0	0	0	0	0	0	0	0	0	0	0	0	0	0	0	0.0186667	0	0	0	0	0	0	0	0	0	0	0.115667	0	0.163667	0	0
2C37M	ControlMG	0.0313333	0.416	0	0	0	0	0	0	0	0	0	0.352333	0	0	0	0.0953333	0	0	0	0	0	0	0	0	0	0	0	0	0	0	0	0	0	0	0	0	0	0	0	0	0	0	0	0.105	0	0	0	0
2C41M	ControlMG	0.013	0.147	0.0116667	0.0943333	0	0	0	0.006	0	0	0	0.147	0	0	0	0.045	0	0	0	0.0673333	0	0.041	0.0176667	0	0	0	0	0	0	0	0	0	0	0	0	0	0	0	0	0.0596667	0	0	0	0.197667	0	0.1	0.00233333	0
2C42M	ControlMG	0.0193333	0.328667	0	0.0733333	0	0	0	0	0	0	0	0.108	0	0	0	0.131333	0	0	0	0.016	0	0.011	0.00433333	0	0	0	0	0	0	0	0	0	0	0	0	0	0	0	0	0	0	0	0	0.168667	0	0.114	0	0
3C11M	ControlMG	0	0.0276667	0.00433333	0.0376667	0	0	0	0	0	0	0	0.103	0	0	0	0.0256667	0	0	0	0.015	0	0	0	0	0	0	0.000333333	0	0	0	0	0	0.593	0	0	0	0	0.0223333	0	0.006	0	0	0	0.113667	0	0.044	0	0
3C12M	ControlMG	0.000333333	0.00866667	0	0.0203333	0.006	0	0	0	0	0	0.0153333	0.007	0.000333333	0	0	0	0	0	0	0.003	0	0.029	0	0	0	0	0	0	0	0	0	0.000666667	0.870333	0	0	0	0	0.00533333	0	0	0.0126667	0	0	0.0106667	0	0	0.000666667	0
3C13M	ControlMG	0	0.008	0.00266667	0.02	0.00533333	0	0	0	0	0	0	0.00866667	0	0	0	0.0326667	0	0	0	0.00166667	0	0.006	0.00166667	0	0	0	0.000333333	0	0	0	0	0	0.821667	0	0	0	0	0.00933333	0	0.002	0.00933333	0	0	0.019	0	0.049	0	0
3C14M	ControlMG	0.007	0.126	0.00833333	0.107333	0	0	0	0	0	0	0	0.0893333	0	0	0	0.069	0	0	0	0.0716667	0	0	0.0176667	0	0	0	0	0	0	0	0	0	0.047	0	0	0	0	0.0293333	0	0.015	0	0	0	0.158	0	0.158333	0	0
3C15M	ControlMG	0	0	0	0.00966667	0	0	0	0	0	0	0	0.441333	0	0.023	0	0.0593333	0	0	0	0	0	0	0	0	0	0	0	0	0	0	0	0	0.00766667	0	0	0	0	0	0	0	0	0	0	0.102667	0	0.130667	0	0
3C21M	ControlMG	0	0.117	0.011	0.093	0	0	0	0	0	0	0	0.072	0	0	0	0.0803333	0	0	0	0	0	0	0.0166667	0	0	0	0	0	0	0	0	0	0	0	0	0	0	0	0	0	0	0	0	0.0676667	0	0.517	0	0
3C22M	ControlMG	0.017	0	0	0.0603333	0	0	0	0	0	0	0	0.17	0	0	0	0.160667	0	0	0	0	0	0	0	0	0	0	0	0	0	0	0	0	0.235667	0	0	0	0	0	0	0	0	0	0	0.06	0	0.296333	0	0
3C23M	ControlMG	0	0	0	0	0	0	0	0	0	0	0	0.181333	0	0	0	0	0	0	0	0	0	0	0	0	0	0	0	0	0	0	0	0	0.596	0	0	0	0	0	0	0	0	0	0	0.042	0	0.180667	0	0
3C24M	ControlMG	0	0	0.0106667	0.00666667	0	0	0	0	0	0	0	0.177	0	0	0	0.034	0	0	0	0	0	0	0	0	0	0	0	0	0	0	0	0	0.485	0	0	0	0	0	0	0	0	0	0	0.066	0	0.153333	0	0
3C25M	ControlMG	0.006	0.143667	0.011	0.0876667	0	0	0	0.00866667	0	0	0.032	0.187333	0	0	0	0.031	0	0	0	0.0646667	0	0	0.0126667	0	0	0	0	0.00633333	0	0	0	0	0.01	0	0	0	0	0	0	0.022	0	0	0	0.101667	0	0.173	0.00333333	0
3C26M	ControlMG	0.013	0	0	0.023	0	0	0	0	0	0	0	0.115	0	0	0	0.258	0	0	0	0	0	0	0	0	0	0	0	0	0	0	0	0	0.000666667	0	0	0.01	0	0	0	0	0	0	0	0.228	0	0.352333	0	0
3C31M	ControlMG	0.018	0.0186667	0.00266667	0.0136667	0	0	0	0.00466667	0	0	0	0.165333	0	0	0	0.125667	0	0	0	0	0	0	0	0	0	0	0	0	0	0	0	0	0	0	0	0	0	0	0	0	0	0	0	0.276333	0	0.312667	0	0
3C41M	ControlMG	0	0	0.00833333	0.00233333	0	0	0	0.003	0	0	0	0.111333	0	0	0	0.029	0	0	0	0	0	0	0	0	0	0	0	0.00266667	0	0	0	0	0	0	0	0	0	0	0	0	0	0	0	0.346333	0	0.497	0	0
3C42M	ControlMG	0	0.141333	0	0.07	0	0	0	0.0823333	0.00433333	0	0	0.126667	0.00633333	0	0	0	0	0	0	0.076	0.006	0	0.021	0	0	0	0	0.00433333	0	0	0	0.00233333	0	0	0	0	0	0.049	0	0.0296667	0	0	0	0.138	0	0.158	0.00433333	0
3C44M	ControlMG	0.022	0	0.02	0.079	0	0	0	0	0	0	0	0.164	0	0	0	0.419	0	0	0	0	0	0	0	0	0.008	0	0	0	0	0	0	0	0	0	0	0	0	0	0	0	0	0	0	0.124667	0	0.121667	0	0
3C45M	ControlMG	0	0.0456667	0.024	0.0276667	0	0	0	0	0	0	0	0.244333	0	0	0	0.227	0	0	0	0.0266667	0	0	0.006	0	0.002	0	0	0.0196667	0	0	0	0	0.00666667	0	0	0	0	0	0	0	0	0.0796667	0	0.103667	0	0.137	0.018	0
3C46M	ControlMG	0	0.323667	0.00866667	0.0533333	0	0	0	0	0	0	0	0.255667	0	0	0	0.103667	0	0	0	0	0	0	0	0	0	0	0	0	0	0	0	0	0	0	0	0	0	0	0	0	0	0	0	0.120333	0	0.117667	0	0
1C11S	ControlSV	0.158333	0.0503333	0.006	0.059	0	0	0	0.018	0	0	0	0.268	0	0	0	0.0846667	0	0	0	0.029	0	0	0	0	0	0	0	0	0	0	0	0	0	0	0	0	0	0.013	0	0	0	0	0	0.0643333	0.000666667	0.226	0	0
1C12S	ControlSV	0.00966667	0.044	0.018	0.066	0	0	0	0.007	0	0	0	0.446	0.001	0	0	0.048	0	0	0	0.0166667	0	0.006	0.00166667	0	0	0	0	0.007	0	0	0	0	0	0	0	0	0	0.00966667	0	0.005	0	0	0	0.107333	0	0.192333	0	0
1C13S	ControlSV	0.00633333	0.0416667	0	0.0943333	0	0	0	0	0	0	0	0.222667	0	0	0	0.137333	0	0	0	0.0276667	0	0.0106667	0.00266667	0	0	0	0	0	0	0	0	0	0	0	0	0	0	0	0	0.0146667	0	0	0	0.157	0	0.272333	0	0
1C14S	ControlSV	0.00333333	0.109333	0.0136667	0.0726667	0	0	0	0.109	0	0	0.0123333	0.246333	0	0	0	0.0456667	0	0	0	0.0573333	0	0	0.052	0	0	0	0.001	0	0	0	0	0	0	0	0	0	0	0	0	0.0333333	0	0	0	0.105667	0	0.100667	0	0
1C15S	ControlSV	0.00866667	0.153667	0	0.0716667	0	0	0	0.246667	0	0	0	0.129667	0	0	0	0.029	0	0	0	0.0486667	0	0.0186667	0.015	0	0	0	0	0.003	0	0	0	0	0	0	0	0	0	0	0	0.0333333	0	0	0	0.107333	0	0.101667	0	0
1C22S	ControlSV	0.00866667	0.186667	0.0116667	0.113667	0	0.00133333	0	0.0333333	0.00266667	0.00266667	0	0.093	0.008	0	0.00133333	0.0343333	0	0.0223333	0.000333333	0.104667	0	0.00333333	0.028	0	0	0	0.00266667	0.00533333	0.001	0.00733333	0	0	0.00566667	0	0	0	0	0.019	0	0.04	0	0	0	0.0796667	0	0.0596667	0.00466667	0
1C23S	ControlSV	0.005	0.194333	0.015	0.0693333	0	0.001	0	0.023	0.00866667	0	0.007	0.0986667	0.00766667	0	0.005	0.029	0	0.00266667	0.003	0.124667	0	0	0.0183333	0.007	0	0	0.002	0.007	0.000666667	0.00733333	0	0.002	0.00466667	0	0	0.002	0	0.0146667	0	0.0273333	0	0	0	0.0986667	0	0.075	0.00466667	0
1C24S	ControlSV	0	0.175333	0.0156667	0.099	0	0	0	0.118333	0.003	0	0	0.122	0.00866667	0	0	0	0	0.018	0	0.110667	0	0.008	0.0173333	0	0	0	0	0.005	0	0	0	0	0	0	0	0	0	0	0	0	0	0	0	0.089	0	0.0706667	0	0
1C25S	ControlSV	0.00633333	0.188	0	0.09	0	0	0	0.176	0	0	0	0.112333	0	0.023	0	0.0303333	0	0	0.002	0.0893333	0	0.0123333	0.0293333	0	0	0	0	0	0	0	0	0	0.00733333	0	0	0	0	0	0	0.021	0	0	0	0.0816667	0	0.0573333	0.00233333	0
2C13S	ControlSV	0	0.218	0.0166667	0.101667	0.018	0	0	0.044	0.03	0	0	0.123667	0	0	0.00333333	0.0393333	0	0	0	0.084	0	0.0233333	0.0216667	0	0	0	0	0.00433333	0	0	0	0	0	0	0	0	0	0	0	0.0536667	0	0	0	0.0953333	0	0.0663333	0	0
2C21S	ControlSV	0.00166667	0.362333	0	0	0	0	0	0.01	0	0	0	0.311	0	0	0	0.0363333	0	0	0	0	0	0	0	0	0	0	0	0	0	0	0	0	0	0	0	0	0	0	0	0	0	0	0	0.06	0	0.218667	0	0
2C22S	ControlSV	0.00566667	0.203	0	0.0783333	0	0	0	0.0243333	0	0	0	0.0503333	0.0303333	0	0	0.066	0	0.016	0	0.054	0	0	0.0213333	0	0	0	0	0.00366667	0	0	0	0	0	0	0	0	0	0	0	0.045	0	0	0	0.073	0	0.126	0.00366667	0
2C23S	ControlSV	0.00833333	0.334667	0	0.00233333	0	0	0	0.002	0	0	0.00266667	0.14	0.000666667	0.0106667	0	0.0406667	0	0	0	0.001	0	0	0	0	0	0	0	0	0	0	0	0	0	0	0	0	0	0	0	0	0	0	0	0.225333	0	0.119667	0	0
2C24S	ControlSV	0	0.176	0.0176667	0.0696667	0	0	0	0.138667	0	0	0	0.160667	0	0	0	0.0226667	0	0	0	0.0876667	0.00766667	0.00466667	0.035	0	0	0	0	0	0	0	0	0	0	0	0	0	0	0	0	0	0	0	0	0.0523333	0	0.0686667	0	0
2C26S	ControlSV	0	0.0673333	0	0.0353333	0	0	0	0.055	0	0	0	0.0586667	0.141333	0	0	0.0126667	0	0	0	0.0263333	0	0	0.005	0	0	0	0.000333333	0	0	0	0	0	0	0	0	0	0	0	0	0.0176667	0	0	0	0.048	0	0.0486667	0	0
2C27S	ControlSV	0	0.077	0	0.067	0	0	0	0.047	0	0	0.019	0.098	0.0793333	0.0153333	0	0	0	0	0	0.0413333	0	0	0.011	0	0	0	0	0	0	0	0	0	0.003	0	0	0	0	0	0	0.0346667	0	0	0	0.068	0	0	0	0
2C31S	ControlSV	0.005	0.097	0.00566667	0.0873333	0	0	0	0.0633333	0	0	0.0233333	0.0496667	0.0733333	0	0.00233333	0.0276667	0	0	0.000666667	0.0423333	0	0	0.012	0	0	0	0.000666667	0.00333333	0	0	0	0	0.002	0	0	0	0	0	0	0.0213333	0	0	0.000333333	0.058	0	0.0646667	0.00233333	0
2C32S	ControlSV	0.01	0.152333	0.0103333	0.065	0	0	0	0.170333	0	0	0	0.143	0	0	0	0.0316667	0	0	0	0.053	0	0.017	0.0216667	0	0	0	0	0	0	0	0	0	0	0	0	0	0	0	0	0.0416667	0	0	0	0.084	0	0.0983333	0.004	0
2C33S	ControlSV	0	0.202333	0.00533333	0.0983333	0	0	0	0.158667	0	0	0.03	0.108333	0	0	0	0	0	0	0	0.0503333	0	0	0.0206667	0	0	0	0	0	0	0	0	0	0	0	0	0	0	0	0	0.0433333	0	0	0	0.0733333	0	0.169	0	0
2C34S	ControlSV	0	0.213	0	0.0823333	0	0	0	0.150667	0.004	0	0	0.0806667	0	0	0.000333333	0.059	0	0	0.000333333	0.0533333	0	0.0263333	0.0143333	0	0	0	0	0	0	0	0	0	0	0	0	0	0	0	0	0.029	0	0	0	0.064	0	0.192333	0	0
2C35S	ControlSV	0.0143333	0	0.011	0.0726667	0	0	0	0.009	0	0	0	0.176	0	0	0	0.117	0	0	0	0	0	0	0	0	0	0	0	0	0	0	0	0	0	0	0	0.035	0	0	0	0	0	0	0	0.141333	0	0.420333	0	0
2C36S	ControlSV	0.006	0.181667	0.0123333	0.095	0.00733333	0	0	0.171667	0	0	0.003	0.0653333	0.00533333	0	0.00166667	0.016	0	0.00433333	0.00133333	0.062	0	0	0.015	0	0.004	0	0.000333333	0.00366667	0.000333333	0	0	0.002	0.00466667	0	0	0	0	0.008	0	0.013	0	0	0	0.086	0.00233333	0.0636667	0.00333333	0
2C42S	ControlSV	0.0133333	0.279667	0.00333333	0.0696667	0	0	0	0.04	0	0	0	0.111333	0	0	0	0.148333	0	0	0	0.0186667	0	0.0123333	0.002	0	0	0	0	0	0	0	0	0	0	0	0	0	0	0	0	0	0	0	0	0.171667	0	0.092	0	0
3C11S	ControlSV	0	0.042	0	0.0116667	0.0113333	0	0	0	0	0	0.0226667	0.105	0	0	0	0.0296667	0	0	0	0.0153333	0	0	0.00233333	0	0	0	0	0	0	0	0	0	0.626667	0	0	0	0	0	0	0	0	0	0	0.076	0	0.0443333	0	0
3C12S	ControlSV	0.002	0.0336667	0	0.0416667	0	0	0	0	0	0	0	0.043	0	0	0	0	0	0	0	0.0243333	0	0.022	0	0	0	0	0	0	0	0	0	0	0.773333	0	0	0	0	0	0	0	0.0226667	0	0	0.0263333	0	0	0	0
3C13S	ControlSV	0	0.039	0.00333333	0.0326667	0	0	0	0	0	0	0.0126667	0	0	0	0	0.0493333	0	0	0	0.016	0	0	0.00433333	0	0	0	0	0	0	0	0	0	0.642333	0	0	0	0	0	0	0.012	0	0	0	0.045	0	0.133333	0	0
3C14S	ControlSV	0.01	0.131	0.0123333	0.093	0.00433333	0	0	0.00966667	0	0	0	0.09	0	0	0	0.0746667	0	0	0	0.073	0	0	0.021	0	0	0	0	0	0	0	0	0.00133333	0.0156667	0	0	0	0	0	0	0.02	0	0	0	0.158	0	0.198333	0.00133333	0
3C15S	ControlSV	0	0.175	0.013	0.126333	0	0	0	0.036	0	0	0	0.114333	0.01	0	0.00333333	0.0286667	0	0	0.00166667	0.0993333	0	0.0253333	0.0266667	0	0	0	0	0.00566667	0	0	0	0	0.0106667	0	0	0	0	0	0	0	0	0	0	0.0836667	0	0.059	0	0
3C21S	ControlSV	0	0.0816667	0.00966667	0.083	0	0	0	0.0163333	0	0	0	0.066	0	0	0	0.125667	0	0	0	0.0236667	0	0.0113333	0.0123333	0	0	0	0	0	0	0	0	0	0	0	0	0	0	0	0	0	0	0	0	0.0583333	0	0.471333	0	0
3C22S	ControlSV	0.0133333	0.018	0	0.11	0	0	0	0.004	0	0	0	0.181333	0	0	0	0.146	0	0	0	0.009	0	0	0.002	0	0	0	0	0	0	0	0	0	0.148333	0	0	0	0	0.0113333	0	0.00566667	0	0	0	0.0516667	0	0.287667	0	0
3C23S	ControlSV	0	0	0	0.00466667	0	0	0	0	0	0	0	0.232333	0	0	0	0.00433333	0	0	0	0	0	0	0	0	0	0	0	0	0	0	0	0	0.486333	0	0	0	0	0	0	0	0	0	0	0.0753333	0	0.197	0	0
3C24S	ControlSV	0	0.0876667	0	0.068	0	0	0	0.07	0	0	0	0.135	0	0	0	0.0263333	0	0.00866667	0	0.0393333	0	0.008	0.012	0	0	0	0	0	0	0	0	0	0.282	0	0	0.002	0	0	0	0	0.0166667	0	0	0.069	0	0.086	0	0
3C25S	ControlSV	0.007	0.173333	0.00966667	0.0946667	0	0.00166667	0	0.0636667	0.00866667	0	0	0.0813333	0.00633333	0	0.00233333	0.027	0.005	0.001	0.000666667	0.0903333	0	0.00533333	0.0206667	0	0	0	0.00333333	0.00466667	0.000333333	0.006	0	0.001	0.00666667	0.000333333	0	0	0	0.0103333	0	0.0236667	0	0	0	0.109333	0.00533333	0.0793333	0.009	0.00133333
3C26S	ControlSV	0	0	0	0.0526667	0	0	0	0.0226667	0	0	0	0.092	0	0	0	0.315333	0	0	0	0	0	0	0	0	0	0	0	0	0	0	0	0	0	0	0	0	0	0	0	0	0	0	0	0.203	0	0.314333	0	0
3C31S	ControlSV	0.006	0.100333	0.00666667	0.0756667	0	0	0	0.028	0	0	0	0.123333	0.003	0	0	0.116333	0	0	0	0.048	0	0.00833333	0.015	0	0	0	0	0	0	0	0	0	0	0	0	0	0	0.0156667	0	0.0373333	0	0	0	0.189333	0	0.189333	0.00233333	0
3C41S	ControlSV	0	0	0.00766667	0.002	0	0	0	0.018	0	0	0	0.122333	0	0	0	0.0356667	0	0	0	0	0	0	0	0	0	0	0	0	0	0	0	0	0	0	0	0	0	0	0	0	0	0	0	0.342667	0	0.47	0.00166667	0
3C42S	ControlSV	0.007	0.128667	0	0.096	0	0	0	0.19	0	0	0	0.097	0	0	0	0.0233333	0	0	0	0.0706667	0	0	0.023	0	0	0	0.00133333	0	0	0	0	0	0	0	0	0	0	0.029	0	0.0433333	0	0	0	0.114	0	0.128333	0.00333333	0
3C43S	ControlSV	0	0.158	0	0.0786667	0	0	0	0.0233333	0	0	0.033	0.144667	0	0	0	0.048	0	0.004	0.00133333	0.0733333	0	0	0.0173333	0	0	0	0	0.00833333	0	0	0	0	0	0	0	0	0	0	0	0.047	0	0.0156667	0	0.0923333	0	0.178	0.00333333	0
3C44S	ControlSV	0.008	0	0.00833333	0.0236667	0	0	0	0	0	0	0	0.217	0	0	0	0.525667	0	0	0	0	0	0	0	0	0.00366667	0	0	0	0	0	0	0	0	0	0	0	0	0	0	0	0	0	0	0.101333	0	0.096	0	0
3C45S	ControlSV	0	0.191	0.0166667	0.119333	0	0	0	0.028	0	0	0	0.0943333	0	0	0.00166667	0.0416667	0	0	0.002	0.0896667	0.00933333	0	0.0306667	0	0	0	0.00266667	0.0123333	0	0	0.00166667	0.002	0.00966667	0	0	0	0	0.0363333	0	0.0616667	0	0.02	0	0.110333	0	0.0386667	0.008	0
3C46S	ControlSV	0	0.304333	0	0.0463333	0	0	0	0	0	0	0	0.271333	0	0	0	0.136	0	0	0	0	0	0	0	0	0	0	0	0	0	0	0	0	0	0	0	0	0	0	0	0	0	0	0	0.119333	0	0.122667	0	0
2T12G	TreatGut	0.00866667	0.146333	0.004	0.0106667	0	0	0	0	0	0	0	0.677	0	0	0	0	0	0	0	0	0	0	0	0	0	0	0	0	0	0	0	0	0	0	0	0	0	0	0	0	0	0	0	0.153333	0	0	0	0
2T22G	TreatGut	0	0.880667	0	0	0	0	0	0	0	0	0	0.119333	0	0	0	0	0	0	0	0	0	0	0	0	0	0	0	0	0	0	0	0	0	0	0	0	0	0	0	0	0	0	0	0	0	0	0	0
2T23G	TreatGut	0.063	0.484333	0	0.031	0	0	0	0	0	0	0	0.214333	0	0	0	0.0286667	0	0	0	0	0	0	0	0	0	0	0	0	0	0	0	0	0	0	0	0	0	0	0	0	0	0	0	0.0306667	0	0.148	0	0
2T24G	TreatGut	0	0.001	0	0.00133333	0	0	0	0	0	0	0	0.517	0	0	0	0.00533333	0	0	0	0	0.475333	0	0	0	0	0	0	0	0	0	0	0	0	0	0	0	0	0	0	0	0	0	0	0	0	0	0	0
2T25G	TreatGut	0.00466667	0	0	0	0	0	0	0	0	0	0	0.171333	0	0	0	0.0313333	0	0	0	0	0	0	0	0	0	0	0	0	0	0	0	0	0	0	0	0	0	0	0	0	0	0	0	0.235667	0	0.557	0	0
2T26G	TreatGut	0	0	0.00666667	0.137	0	0	0	0	0	0	0	0	0	0	0	0.531	0	0	0	0	0	0	0	0	0	0	0	0	0	0	0	0	0	0	0	0	0	0	0	0	0	0	0	0.204	0	0.121333	0	0
2T27G	TreatGut	0	0	0.00333333	0	0	0	0	0	0	0	0	0.667667	0	0	0	0.0616667	0	0	0	0	0	0	0	0	0	0	0	0	0	0	0	0	0	0	0	0	0	0	0	0	0	0	0	0	0	0.0626667	0	0
2T31G	TreatGut	0	0	0	0.00133333	0	0	0	0	0	0	0	0.241333	0	0	0	0	0	0	0	0	0	0	0	0	0	0	0	0	0	0	0	0	0	0	0	0	0	0	0	0	0	0	0	0.497333	0	0.253667	0	0
2T32G	TreatGut	0	0.002	0.0206667	0.05	0	0	0	0	0	0	0	0	0	0	0	0.185	0	0	0	0	0	0	0	0	0	0	0	0	0	0	0	0	0	0	0	0	0	0	0	0	0	0	0	0	0	0.742333	0	0
2T33G	TreatGut	0.000333333	0	0.006	0.0733333	0	0	0	0	0	0	0	0.606667	0	0	0	0.0776667	0	0	0	0	0	0	0	0	0	0	0	0	0	0	0	0	0	0	0	0	0	0	0	0	0	0	0	0.113	0	0.121667	0	0
2T34G	TreatGut	0	0.01	0.011	0.0486667	0	0	0	0	0	0	0	0.179667	0	0	0	0.0226667	0	0	0	0	0.003	0	0	0	0	0	0	0	0	0	0	0	0	0	0	0	0	0	0	0	0	0	0	0.265333	0	0.43	0	0
2T35G	TreatGut	0.0503333	0.332	0.006	0.0433333	0	0	0	0	0	0	0	0.24	0	0	0	0.1	0	0	0	0	0	0	0	0	0	0	0	0	0	0	0	0	0	0	0	0	0	0	0	0	0	0	0	0.136333	0	0.092	0	0
2T41G	TreatGut	0.0116667	0	0.015	0.102667	0	0	0	0	0	0	0	0.239667	0	0	0	0.140333	0	0	0	0	0	0	0	0	0	0	0	0	0	0	0	0	0	0	0	0	0	0	0	0	0	0	0	0.140333	0	0.350333	0	0
2T42G	TreatGut	0	0	0	0.0146667	0	0	0	0	0	0	0	0.209	0	0	0	0.0986667	0	0	0	0	0	0	0	0	0	0	0	0	0	0	0	0	0.333667	0	0	0	0	0	0	0	0	0	0	0.234667	0	0.109333	0	0
2T43G	TreatGut	0.191	0	0	0.0956667	0	0	0	0	0	0	0	0.192333	0	0	0	0	0	0	0	0	0	0	0	0	0.009	0	0	0	0	0	0	0	0	0	0	0	0	0	0	0	0	0	0	0	0	0.512	0	0
2T44G	TreatGut	0	0	0.039	0.0146667	0	0	0	0	0	0	0	0.129333	0	0	0	0	0	0	0	0	0	0	0	0	0	0	0	0	0	0	0	0	0	0	0	0	0	0	0	0.01	0	0	0	0.0966667	0	0.710333	0	0
3T110G	TreatGut	0.00766667	0	0	0.114667	0	0	0	0	0	0	0	0.258333	0	0	0	0.178667	0	0	0	0	0	0	0	0	0.005	0	0	0	0	0	0	0	0.00166667	0	0	0	0	0	0	0	0	0	0	0.206333	0	0.227667	0	0
3T11G	TreatGut	0	0	0.039	0.107333	0	0	0	0	0	0	0	0.184667	0	0	0	0.236	0	0	0	0	0	0	0	0	0.00266667	0	0	0	0	0	0	0	0	0	0	0	0	0	0	0	0	0	0	0.278333	0	0.152	0	0
3T12G	TreatGut	0	0	0	0.103	0	0	0	0	0	0	0	0.222333	0	0	0	0.105	0	0	0	0	0.220667	0	0.00466667	0	0.00666667	0	0	0	0	0	0	0	0	0	0	0	0	0	0	0	0	0	0	0.0436667	0	0.294	0	0
3T13G	TreatGut	0	0	0	0	0	0	0	0	0	0	0	0	0	0	0	0.0636667	0	0	0	0	0	0	0	0	0	0	0	0	0	0	0	0	0.494333	0	0	0	0	0	0	0	0	0	0	0.382333	0	0.0596667	0	0
3T14G	TreatGut	0	0	0.00533333	0	0	0	0	0	0	0	0	0.314	0	0	0	0	0	0	0	0	0	0	0	0	0	0	0	0	0	0	0	0	0.454	0	0	0	0	0	0	0	0	0	0	0.006	0	0.220667	0	0
3T15G	TreatGut	0.337	0	0.008	0.0906667	0	0	0	0	0	0	0	0.242	0	0	0	0.0756667	0	0	0	0	0	0	0.001	0	0.00266667	0	0	0	0	0	0	0	0.001	0	0	0	0	0	0	0	0	0	0	0.028	0	0.213	0	0
3T16G	TreatGut	0.00566667	0	0.0166667	0.04	0	0	0	0	0	0	0	0.486667	0	0	0	0.0306667	0	0	0	0	0	0	0.003	0	0.003	0	0	0	0	0	0	0	0	0	0	0	0	0	0	0.003	0	0	0	0.342	0	0.0686667	0.000666667	0
3T17G	TreatGut	0.00166667	0.07	0	0.051	0	0	0	0.003	0	0	0.009	0.139667	0	0	0	0.548333	0	0	0	0.0306667	0	0.0206667	0.00433333	0	0.013	0	0	0	0	0	0	0	0	0	0	0	0	0	0	0.028	0	0	0	0.0126667	0	0.051	0	0
3T18G	TreatGut	0.0473333	0	0.00666667	0.0426667	0	0	0	0	0	0	0	0.137667	0	0	0	0.245667	0	0	0	0	0	0	0	0	0	0	0	0	0	0	0	0	0	0	0	0	0	0	0	0.0323333	0	0	0	0.116333	0	0.344333	0	0
3T19G	TreatGut	0	0	0.00533333	0.0186667	0	0	0	0	0	0	0	0.043	0	0	0	0.121667	0	0	0	0	0	0	0	0	0	0	0	0	0	0	0	0	0.396667	0	0	0	0	0	0	0	0	0	0	0.27	0	0.144667	0	0
1T13M	TreatMG	0.0356667	0.0763333	0.016	0.109333	0	0	0	0	0	0	0	0.204	0	0	0	0.195	0	0	0	0.039	0	0.022	0	0	0.006	0	0	0	0	0	0	0	0	0	0	0.00333333	0	0	0	0	0	0	0	0.0293333	0	0.230333	0.001	0
1T22M	TreatMG	0	0.0916667	0.046	0.158333	0	0	0	0	0	0	0	0	0	0	0	0	0	0	0	0.0153333	0	0.0296667	0	0	0.00666667	0	0	0	0	0	0	0	0	0	0	0	0	0	0	0	0	0	0	0.108333	0	0	0	0
1T23M	TreatMG	0.00966667	0.152	0	0.0813333	0	0	0	0.033	0	0	0	0.208333	0	0.0126667	0	0.0416667	0	0	0	0.0616667	0	0	0	0	0	0	0.002	0	0	0	0	0	0	0	0	0	0	0	0	0	0	0	0	0.166	0	0.128	0	0
2T12M	TreatMG	0	0.146	0	0.00633333	0	0	0	0	0	0	0	0.511667	0	0.025	0	0.0693333	0	0	0	0	0	0	0	0	0	0	0	0	0	0	0	0	0	0	0	0	0	0	0	0	0	0	0	0.0796667	0	0.162	0	0
2T21M	TreatMG	0.135667	0.0563333	0.007	0.047	0	0	0	0.00333333	0	0	0	0.385	0.00133333	0	0	0.039	0	0	0.000666667	0.0346667	0	0.01	0.00533333	0	0	0	0.000333333	0.00166667	0	0	0	0	0.001	0	0	0	0	0	0	0.0133333	0	0	0	0.138667	0	0.086	0.00133333	0
2T24M	TreatMG	0.0233333	0.242667	0.00766667	0.102333	0	0	0	0.005	0	0.002	0	0.124333	0.00433333	0	0.00166667	0.028	0	0	0.000333333	0.0716667	0	0.021	0.0126667	0	0.00133333	0	0.000666667	0.00566667	0	0.003	0	0.00133333	0.003	0	0	0.00533333	0	0	0	0.023	0	0	0	0.0703333	0.00233333	0.145	0.00333333	0
2T25M	TreatMG	0	0.0963333	0.00566667	0.076	0	0	0	0.00266667	0	0	0.00833333	0.122333	0.003	0	0	0.031	0	0.00966667	0.00133333	0.053	0.005	0.01	0.00733333	0	0	0	0.000666667	0.00266667	0	0	0.000666667	0.001	0.00166667	0	0	0	0	0.0126667	0	0.0143333	0.001	0	0	0.152333	0.001	0.302667	0.001	0
2T31M	TreatMG	0.0106667	0.156333	0.01	0.0986667	0	0	0	0	0.009	0	0.0253333	0.274	0	0.0113333	0.00266667	0	0	0	0	0.059	0	0	0.0276667	0	0	0	0	0.00533333	0.000666667	0.005	0	0	0	0	0	0	0	0	0	0.053	0	0	0	0.122333	0	0.075	0	0
2T33M	TreatMG	0.006	0.156333	0.00633333	0.0983333	0.003	0.000333333	0	0.00866667	0.005	0.001	0.00633333	0.152333	0.00666667	0	0.00266667	0.0516667	0	0.00133333	0.001	0.0703333	0	0	0.0166667	0.00566667	0	0	0.00166667	0.00533333	0.000333333	0.004	0	0.00166667	0.00266667	0.000333333	0	0	0	0.0243333	0	0.0293333	0	0	0	0.062	0.00366667	0.170333	0.00333333	0
2T41M	TreatMG	0.004	0.201333	0.014	0.117667	0	0	0.000666667	0	0	0	0	0.150667	0.00833333	0	0.00166667	0.0393333	0	0.0206667	0.000666667	0.0746667	0	0.0366667	0.0166667	0	0	0	0.001	0.00233333	0	0	0	0	0.00766667	0	0	0	0	0	0	0.0256667	0	0	0	0.101667	0	0.084	0	0
2T43M	TreatMG	0.0106667	0.161	0.00833333	0.111667	0	0	0	0.00466667	0	0	0	0.259667	0.01	0	0	0.0313333	0	0	0	0.0623333	0	0.0506667	0.0226667	0	0	0	0	0.003	0	0	0	0.002	0	0	0	0	0	0	0	0.066	0	0	0	0.067	0	0.048	0.00333333	0
2T44M	TreatMG	0	0.116667	0.028	0.0716667	0	0	0	0.00466667	0	0	0	0.135333	0.008	0	0	0	0	0	0	0.054	0.00433333	0	0.0123333	0	0	0	0	0.003	0	0	0	0.001	0	0	0	0	0	0	0	0.0253333	0	0	0	0.0763333	0.00133333	0.390667	0.00233333	0
3T110M	TreatMG	0	0.179	0.0113333	0.118333	0	0	0	0.014	0	0	0.00133333	0.084	0.00866667	0	0.002	0.0293333	0	0	0.001	0.0966667	0.006	0.02	0.0163333	0	0.00166667	0	0.001	0.009	0	0.008	0	0.002	0.0366667	0	0	0.00366667	0	0.02	0	0.0386667	0.006	0.02	0	0.0716667	0.00133333	0.0656667	0.00566667	0
3T11M	TreatMG	0.00733333	0.178	0.012	0.0996667	0	0	0	0.01	0	0.002	0	0.145	0	0	0	0.0323333	0	0	0.00166667	0.09	0	0.0476667	0.0193333	0	0	0.00333333	0	0.0143333	0	0	0	0.002	0	0	0	0	0	0	0	0.0376667	0	0.0346667	0	0.0813333	0.001	0.0626667	0.009	0
3T12M	TreatMG	0	0	0	0.177333	0	0	0	0	0	0	0	0.246333	0	0	0	0.0703333	0	0	0	0	0.0103333	0	0.0223333	0	0.028	0	0	0	0	0	0	0	0	0	0	0	0	0	0	0	0	0.00366667	0	0.047	0	0.394667	0	0
3T13M	TreatMG	0	0.00866667	0	0.02	0	0	0	0	0.001	0	0	0.013	0	0	0	0.00566667	0	0	0	0.006	0	0.0103333	0.00133333	0	0	0	0	0	0	0	0	0	0.866667	0	0	0	0	0.00966667	0	0.00233333	0	0	0	0.0423333	0	0.012	0	0
3T14M	TreatMG	0	0.0103333	0.0166667	0.0143333	0	0	0	0	0	0	0	0.174	0	0	0	0	0	0	0	0.00633333	0	0.0226667	0	0	0	0	0	0	0	0	0	0	0.610667	0	0	0	0	0	0	0	0	0	0	0.008	0	0.134667	0	0
3T15M	TreatMG	0.023	0.00366667	0.0143333	0.156667	0	0	0	0	0	0	0	0.305333	0	0	0	0.0886667	0	0	0	0	0	0	0.00266667	0	0.009	0	0	0	0	0	0	0	0.015	0	0	0	0	0	0	0	0	0	0	0.0513333	0	0.327667	0.00266667	0
3T16M	TreatMG	0	0.136333	0.02	0.0766667	0	0	0	0.00533333	0	0	0.016	0.275333	0	0	0	0.0406667	0	0.0126667	0	0.0643333	0	0	0	0.017	0.00466667	0	0	0.005	0	0	0	0	0.006	0	0	0	0	0	0	0	0	0.017	0	0.121333	0	0.109667	0.003	0
3T17M	TreatMG	0.00966667	0.203667	0.00766667	0.113333	0	0	0	0.006	0	0	0	0.131667	0.00633333	0	0.00233333	0.084	0	0.003	0.001	0.0963333	0	0.0236667	0.021	0	0.00233333	0	0.000333333	0.00633333	0	0.00666667	0	0.002	0.00333333	0	0	0	0	0	0	0.0413333	0	0	0	0.083	0	0.045	0.007	0
3T18M	TreatMG	0.0153333	0.023	0	0.018	0	0	0	0	0	0	0	0.167	0	0	0	0.248	0	0	0	0.00966667	0	0	0.00166667	0	0	0	0	0.00266667	0	0	0	0	0.00366667	0	0	0	0	0	0	0	0	0.019	0	0.115	0	0.357667	0	0
3T19M	TreatMG	0	0.013	0.007	0.025	0	0	0	0	0	0	0	0.0273333	0	0	0	0.058	0.001	0	0	0.00666667	0.000333333	0.008	0	0	0	0	0	0	0	0	0	0	0.612333	0	0	0	0	0	0	0	0	0	0	0.0696667	0	0.164667	0	0
1T11S	TreatSV	0.00666667	0.217	0.0183333	0.0806667	0	0	0	0.0136667	0.0106667	0	0	0.11	0.0106667	0.0176667	0.001	0.0476667	0.012	0	0.000666667	0.113333	0	0.0156667	0.0286667	0	0	0	0.00133333	0.00866667	0	0	0	0	0.00466667	0	0	0	0	0	0	0.0203333	0	0	0	0.08	0	0.0746667	0.00166667	0
1T12S	TreatSV	0	0.225333	0.0176667	0.0883333	0	0	0	0.00566667	0	0	0.028	0.103667	0.005	0.0116667	0	0.0416667	0	0.00233333	0.002	0.112333	0.00333333	0	0.019	0	0	0	0.002	0.00733333	0	0	0	0.000666667	0.00633333	0	0	0.00333333	0	0	0	0.0373333	0	0	0	0.088	0.00266667	0.0696667	0.00466667	0
1T13S	TreatSV	0.018	0.110333	0	0.086	0	0	0	0.00233333	0	0	0	0.203333	0	0	0	0.220667	0	0	0	0.0483333	0	0	0	0	0	0	0	0	0	0	0	0	0	0	0	0	0	0	0	0	0	0	0	0.0416667	0	0.209	0	0
1T21S	TreatSV	0.147333	0.103333	0.018	0.0716667	0	0	0	0.00266667	0	0.001	0.00966667	0.0573333	0.005	0	0	0.0273333	0	0	0	0.056	0	0	0.015	0	0	0	0.00133333	0.002	0	0.00466667	0	0.00133333	0.00333333	0	0	0	0	0	0	0.0196667	0	0	0	0.0403333	0.002	0.03	0.004	0
1T22S	TreatSV	0	0.0716667	0.0466667	0.163667	0	0	0	0	0	0	0	0	0	0	0	0	0	0	0	0.0153333	0	0.0126667	0	0	0	0	0	0	0	0	0	0	0	0	0	0	0	0	0	0.00933333	0	0	0	0.0873333	0	0	0	0
1T23S	TreatSV	0.006	0.0953333	0.008	0.0783333	0	0	0	0.065	0	0.002	0	0.226333	0	0	0	0.075	0.008	0.0123333	0.001	0.0473333	0	0.0136667	0	0	0	0	0	0	0	0	0	0	0	0	0	0	0	0	0	0.035	0	0	0	0.184667	0	0.111	0.00166667	0
2T11S	TreatSV	0	0.148333	0	0.105333	0	0	0	0.206333	0	0	0.012	0.160333	0	0	0	0.0423333	0	0	0	0.0876667	0	0.0203333	0.015	0	0	0	0	0	0	0	0	0	0	0	0	0	0	0	0	0	0	0	0	0.075	0	0	0	0
2T12S	TreatSV	0	0.151667	0.025	0.0986667	0	0	0	0.220667	0	0	0	0.0803333	0	0	0	0.0323333	0	0	0	0.103333	0.007	0	0.0313333	0	0	0	0.002	0.00566667	0	0	0	0	0.00766667	0	0	0	0	0	0	0.0456667	0	0	0	0.0853333	0	0.0433333	0	0
2T22S	TreatSV	0	0.483667	0	0.0713333	0	0	0	0.0883333	0	0	0	0.122	0	0	0	0	0	0	0	0.05	0	0.0233333	0.0186667	0	0	0	0	0.00333333	0.00133333	0	0	0	0	0	0	0	0	0	0	0.0106667	0	0	0	0.0523333	0	0	0.00333333	0
2T23S	TreatSV	0.022	0.184	0.00733333	0.0766667	0.00733333	0	0	0.178333	0.00366667	0	0	0.107667	0.005	0	0.00133333	0.0316667	0	0	0.000666667	0.0573333	0	0.002	0.009	0	0.001	0	0.00233333	0.00166667	0	0	0	0.001	0	0	0	0	0	0.0383333	0	0.0166667	0	0	0	0.0666667	0	0.127	0.002	0
2T24S	TreatSV	0.009	0.186	0	0.0953333	0	0	0	0.186667	0.006	0.00233333	0	0.241333	0	0	0	0	0	0	0	0.0583333	0	0	0.0186667	0	0	0	0	0	0	0	0	0	0	0	0	0	0	0.0223333	0	0.042	0	0	0	0.078	0	0	0	0
2T25S	TreatSV	0	0.0583333	0	0.0413333	0	0	0	0.0626667	0	0	0	0.128667	0	0	0.000666667	0.0273333	0	0	0	0.036	0	0	0.00666667	0	0	0	0	0	0	0	0	0	0	0	0	0	0	0.019	0	0.026	0	0	0	0.161667	0	0.414	0	0
2T27S	TreatSV	0	0.174667	0	0.119667	0	0	0	0.008	0	0	0	0.11	0.00766667	0	0.00133333	0.124	0	0	0	0.0906667	0.00633333	0.0293333	0.017	0	0	0	0.001	0.00533333	0	0	0	0.00166667	0.007	0	0	0	0	0	0	0.031	0	0	0	0.108	0	0.0626667	0	0
2T31S	TreatSV	0	0.164333	0.0133333	0.098	0	0	0	0.00766667	0	0	0	0.258333	0	0	0	0	0	0	0	0.0836667	0.00533333	0.0273333	0.0143333	0	0	0	0	0	0	0	0	0	0.00633333	0	0	0	0	0	0	0.0153333	0	0	0	0.155667	0	0.0773333	0	0
2T32S	TreatSV	0.00766667	0.149667	0.0146667	0.0993333	0	0	0	0	0	0	0	0.00933333	0	0	0	0.0716667	0	0	0.002	0.073	0	0	0.0246667	0	0	0	0	0	0.000666667	0	0	0	0.00366667	0	0	0	0	0	0	0.0533333	0	0	0	0.0746667	0	0.362333	0	0
2T33S	TreatSV	0.00766667	0.197667	0.00733333	0.0773333	0	0	0	0.018	0	0	0.00566667	0.188333	0.006	0	0	0.056	0	0	0	0.0556667	0	0	0.00966667	0	0	0	0.00133333	0.00166667	0	0	0	0.00133333	0.001	0	0	0	0	0.0143333	0	0.0196667	0	0	0	0.085	0.002	0.159333	0.00266667	0
2T34S	TreatSV	0.00166667	0.0853333	0.02	0.064	0	0	0	0	0	0	0	0.205	0	0	0	0.0173333	0	0	0	0.0366667	0	0	0.00633333	0	0	0	0.000333333	0	0	0	0	0	0	0	0	0	0	0	0	0.0156667	0	0	0	0.144	0	0.360333	0	0
2T35S	TreatSV	0.00933333	0.211333	0.013	0.0873333	0	0	0	0	0	0	0	0.161	0	0.004	0	0.096	0	0	0	0.0686667	0	0.022	0.0183333	0	0	0	0	0	0.000333333	0	0	0	0	0	0	0	0	0	0	0.049	0	0	0	0.126667	0	0.0966667	0	0
2T41S	TreatSV	0.00633333	0.195667	0.012	0.103333	0.006	0	0	0.00833333	0.00366667	0.002	0	0.0853333	0.00766667	0	0.005	0.0256667	0	0.0143333	0.00266667	0.104	0	0.004	0.0183333	0.007	0	0	0.00166667	0.00366667	0	0.00866667	0	0.002	0.00733333	0	0	0	0	0.02	0	0.0393333	0	0.00333333	0	0.105	0	0.0663333	0.00533333	0
2T43S	TreatSV	0.00766667	0.191	0.015	0.0803333	0.00366667	0	0	0	0	0	0.0183333	0.124	0	0	0	0.0343333	0	0.0173333	0.00133333	0.0826667	0	0.0203333	0.022	0	0	0	0	0	0	0	0	0	0	0	0.002	0	0	0	0	0.0356667	0	0	0	0.086	0	0.169	0	0
2T44S	TreatSV	0.00733333	0.0993333	0.0283333	0.0533333	0	0	0	0.00533333	0	0	0.0246667	0.137667	0.00433333	0	0	0	0	0.0123333	0	0.0516667	0	0	0.0123333	0	0	0	0.000666667	0.00266667	0	0	0	0.00133333	0	0	0	0	0	0	0	0.016	0	0	0	0.0636667	0	0.424333	0	0
3T11S	TreatSV	0.004	0.167	0.0143333	0.139333	0	0	0	0.0383333	0	0	0.0316667	0.124	0	0	0	0	0	0	0.00133333	0.106	0	0	0.027	0	0	0	0.00266667	0.0163333	0.002	0	0	0	0.011	0	0	0	0	0	0	0	0	0.0236667	0	0.0973333	0	0.049	0.00633333	0
3T12S	TreatSV	0	0.00266667	0	0.0606667	0	0	0	0.003	0	0	0	0.234	0	0	0	0.156667	0.00266667	0	0	0	0	0	0	0	0.0243333	0	0	0.00266667	0	0	0	0	0	0	0	0	0	0	0	0	0	0.01	0	0.06	0	0.443333	0	0
3T13S	TreatSV	0	0.0206667	0	0	0	0	0	0	0	0	0	0.0266667	0	0	0	0.0286667	0	0	0	0.01	0	0	0	0	0	0	0	0.001	0	0	0	0	0.721333	0	0	0	0	0.017	0	0	0.013	0	0	0.114333	0	0.0363333	0	0
3T14S	TreatSV	0	0	0.014	0	0	0	0	0	0	0	0	0.362667	0	0	0	0	0	0	0	0	0	0	0	0	0	0	0	0	0	0	0	0	0.383	0	0	0	0.001	0	0	0	0	0	0	0	0	0.239333	0	0
3T15S	TreatSV	0.012	0.0896667	0.012	0.104	0.00266667	0	0	0.007	0	0	0.0106667	0.238333	0	0	0	0.093	0	0	0	0.0426667	0	0.00633333	0.00733333	0	0.00466667	0	0	0.003	0	0	0	0	0.00733333	0	0	0	0	0	0	0.016	0	0	0	0.0476667	0	0.247	0.00133333	0
3T16S	TreatSV	0.006	0.158667	0.02	0.086	0	0	0	0.0413333	0	0	0.0196667	0.233	0	0	0	0.0333333	0	0	0.00166667	0.0653333	0	0	0.0223333	0	0	0	0	0.00866667	0	0	0	0	0	0	0	0	0	0	0	0.018	0	0.0233333	0	0.104	0	0.0643333	0.00533333	0
3T17S	TreatSV	0.006	0.103333	0.012	0.07	0	0	0	0.013	0	0	0	0.207	0	0	0	0.238333	0	0	0	0.0736667	0	0.0206667	0.0183333	0	0	0	0	0.00566667	0	0	0	0	0	0	0	0	0	0	0	0	0	0	0	0.095	0	0.0493333	0.00233333	0
3T18S	TreatSV	0.00466667	0.119	0.009	0.0653333	0	0	0	0.009	0	0	0	0.115	0	0	0	0.174667	0	0	0	0.0563333	0	0.0223333	0.014	0	0	0	0	0.00433333	0	0	0	0	0	0	0	0	0	0	0	0.0243333	0	0	0	0.0796667	0	0.257667	0	0
3T19S	TreatSV	0	0	0	0.023	0	0	0	0	0	0	0	0.035	0	0	0	0.115667	0	0	0	0	0	0	0	0	0	0	0	0	0	0	0	0	0.472	0	0	0	0	0	0	0	0	0.0173333	0	0.098	0	0.239	0	0
[truncated: 55 more columns]
